# Supplementary figures and images for: High-resolution local gravity model of the south pole of the Moon from GRAIL extended mission data
Source: PubMed Central journal article supplement — Geophys Res Lett. 2014 May 30;41(10):3367–74. doi: 10.1002/2014GL060178 (PMC4459178; doi:10.1002/2014gl060178), 2014-05-30

# GRGM900A free-air

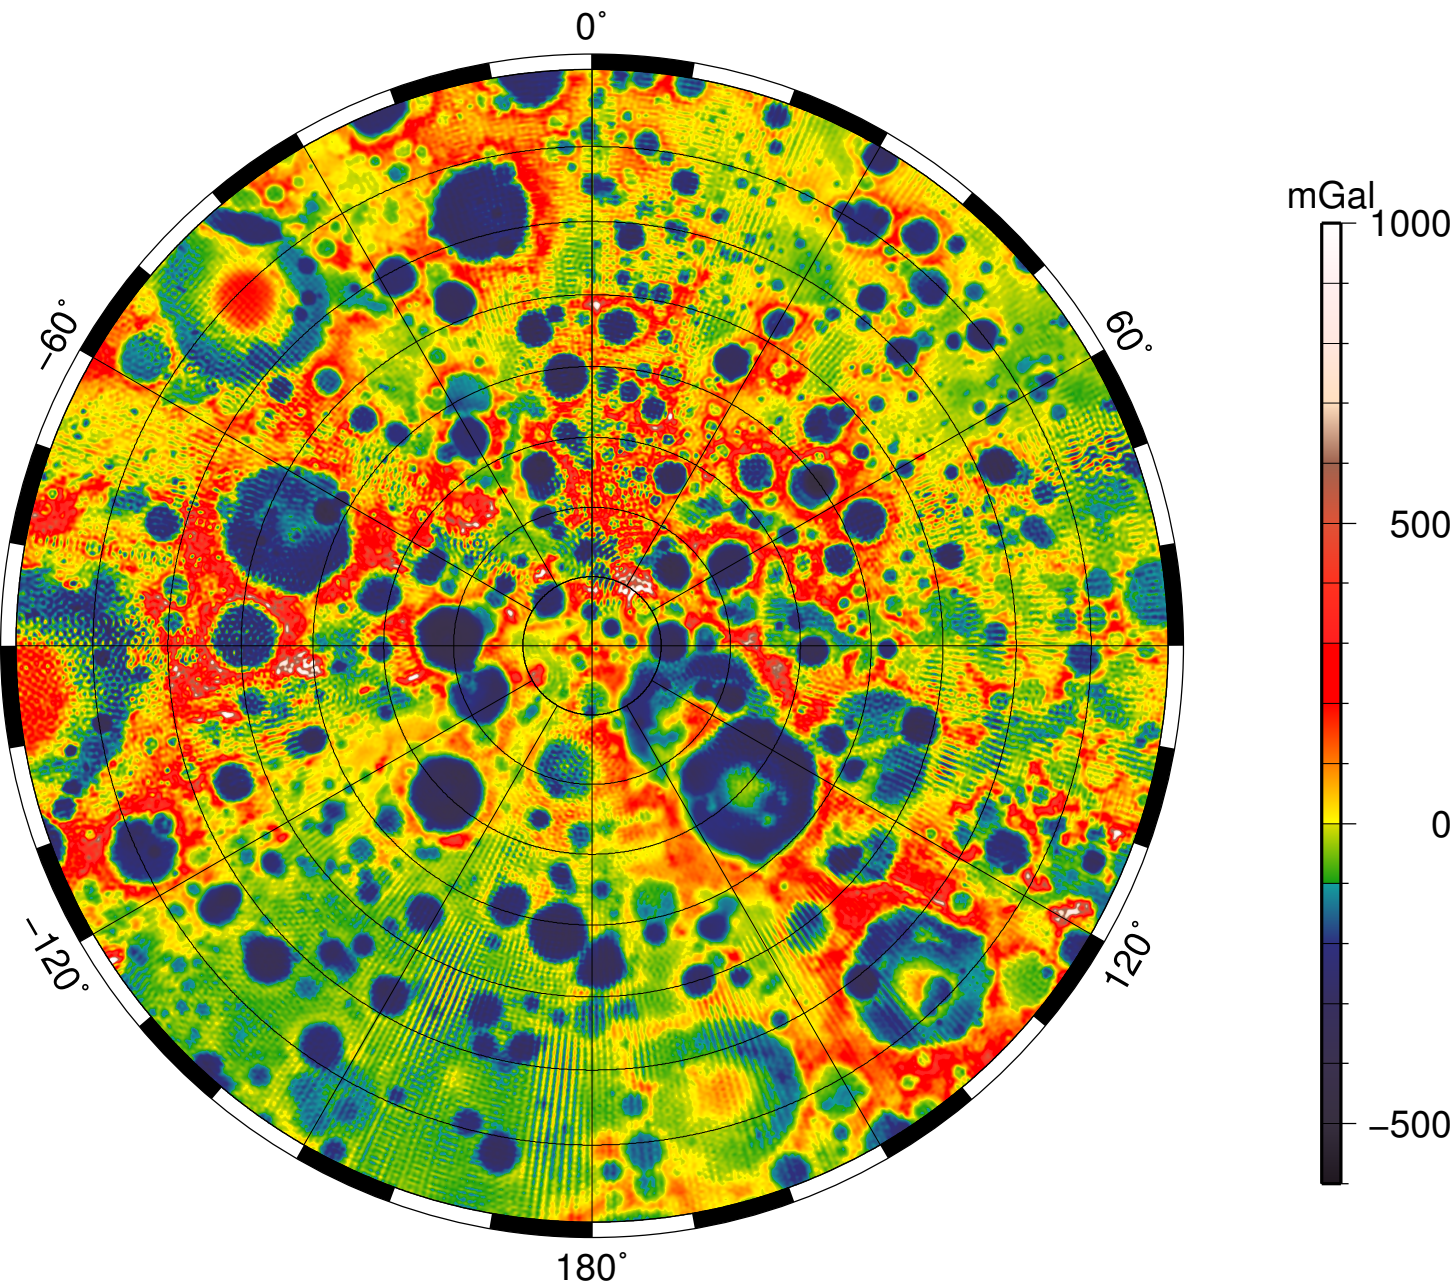

Supplement: grl0041-3367-sd2.pdf [file grl0041-3367-sd2.pdf]

# Local free-air

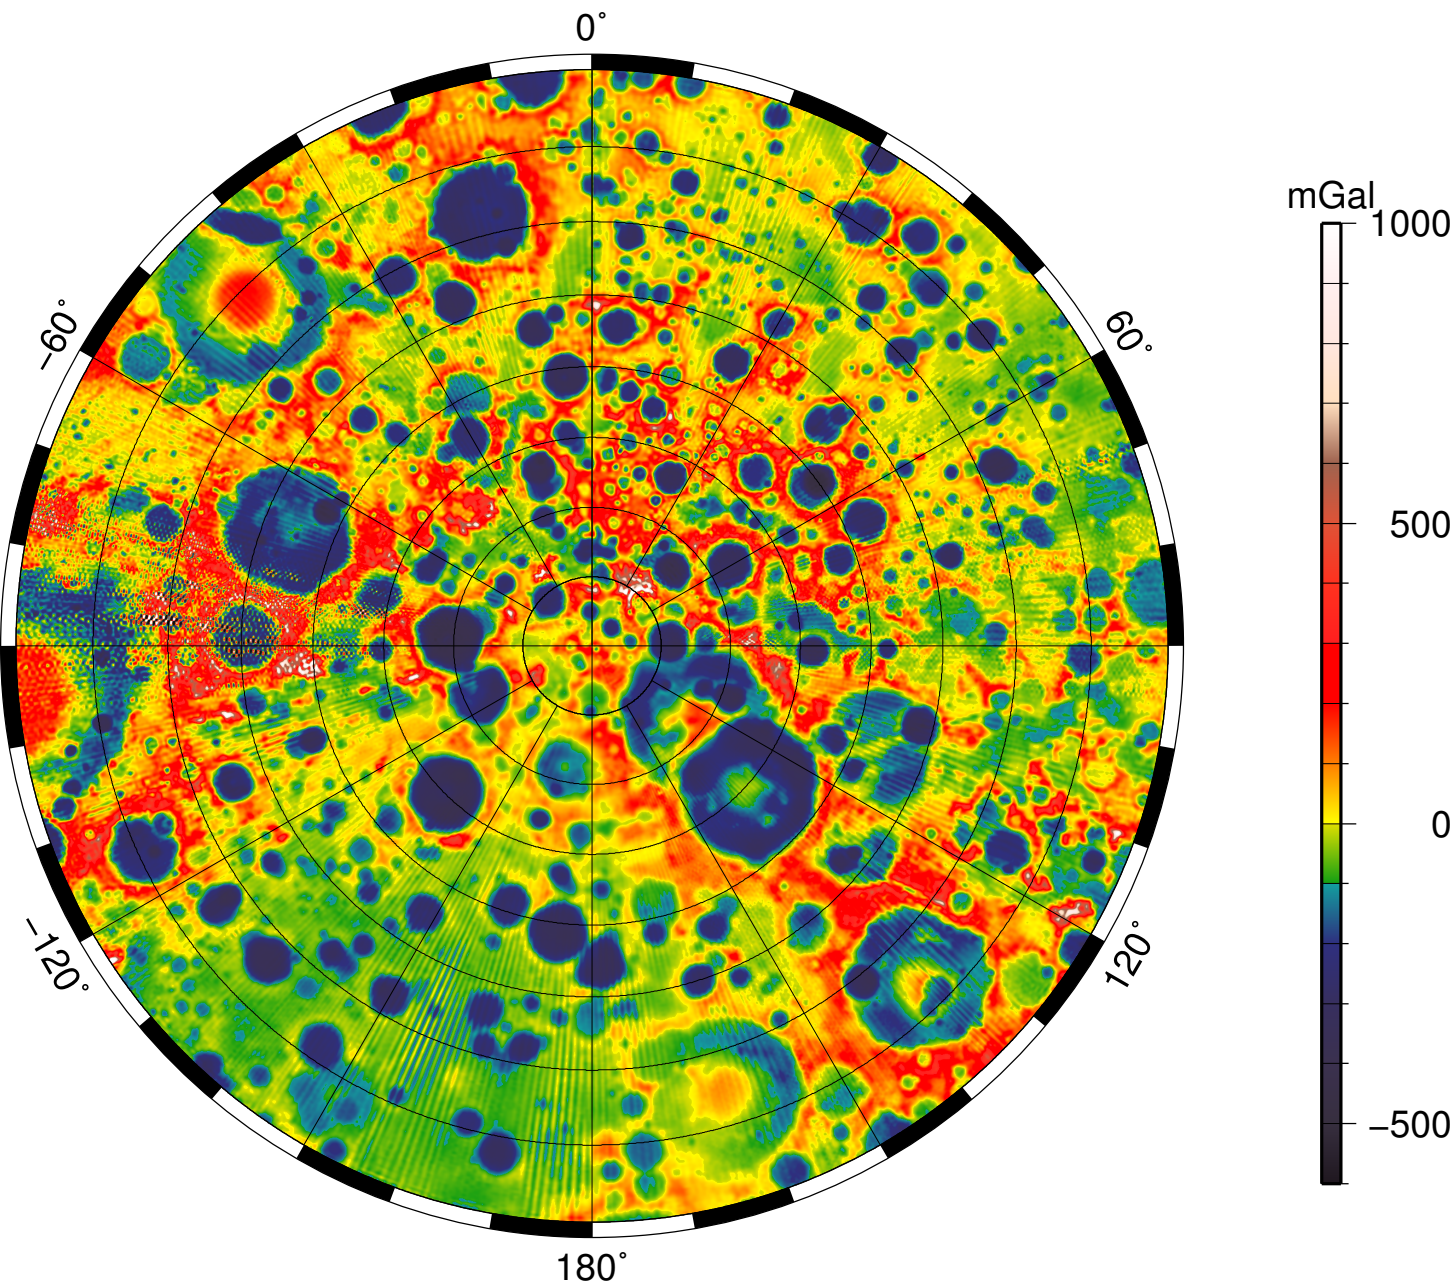

Supplement: grl0041-3367-sd3.pdf [file grl0041-3367-sd3.pdf]

# Local adjustments

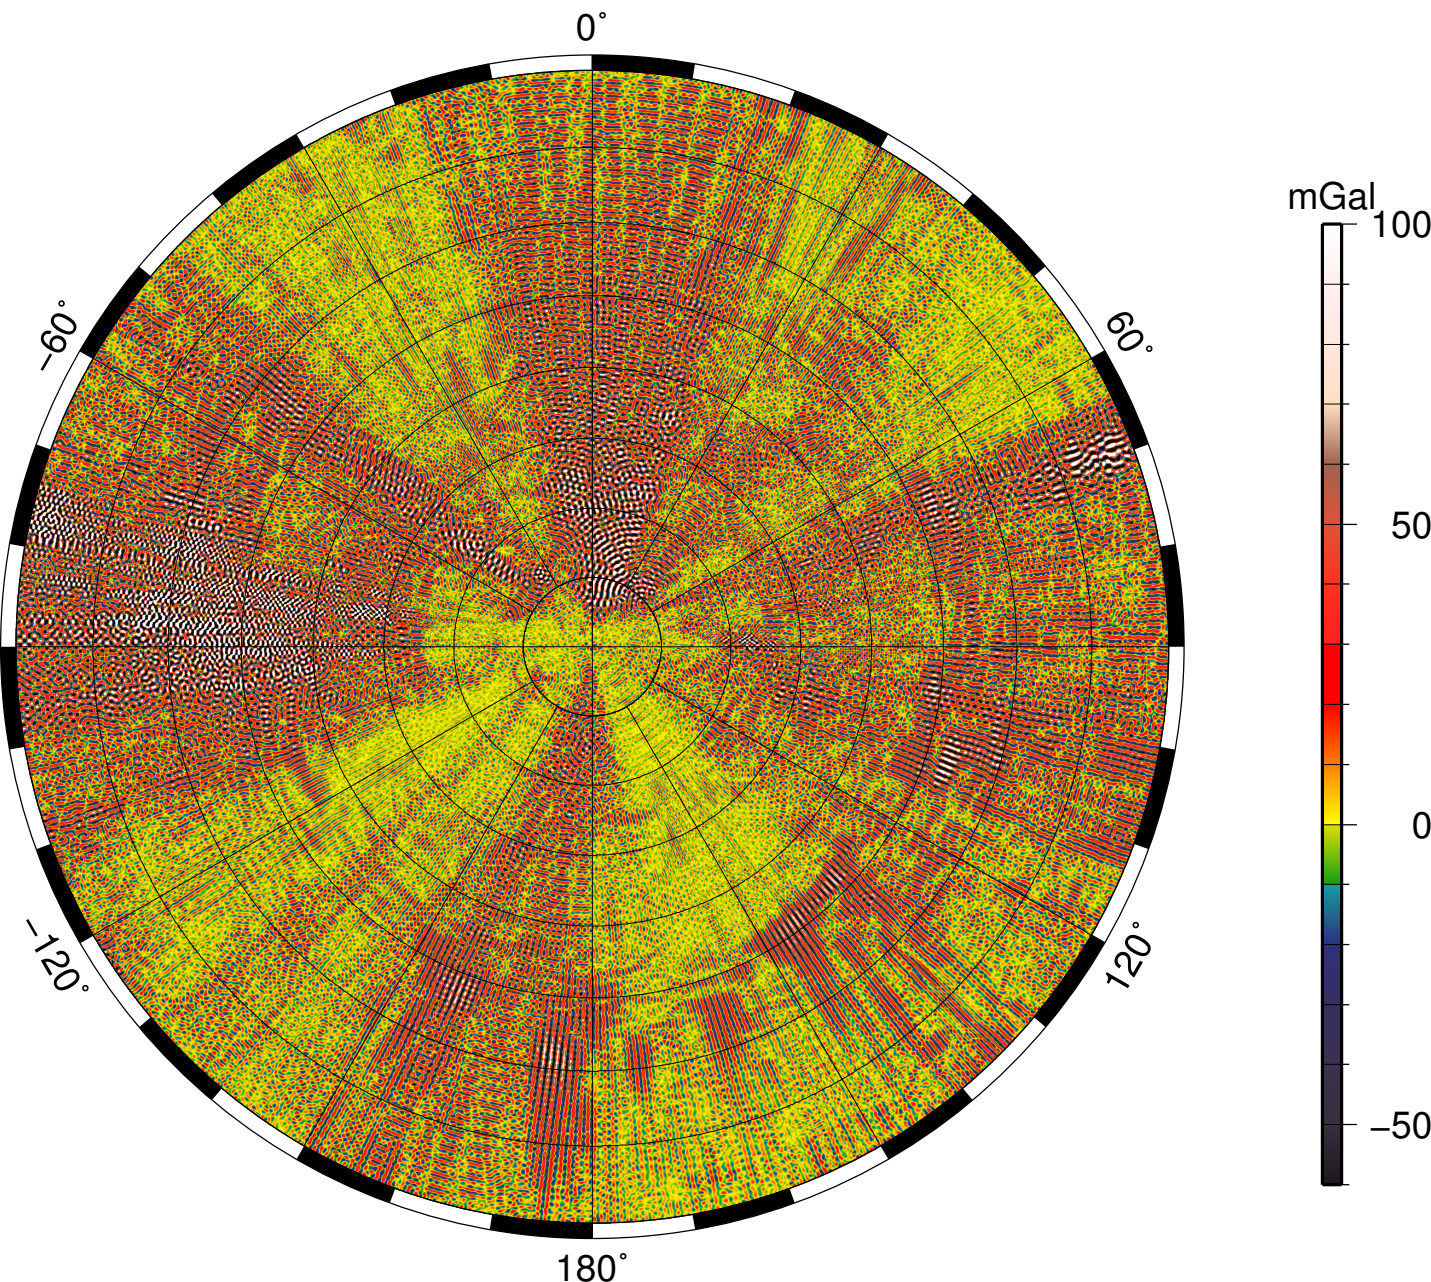

Supplement: grl0041-3367-sd4.pdf [file grl0041-3367-sd4.pdf]

# GRGM900 Bouguer

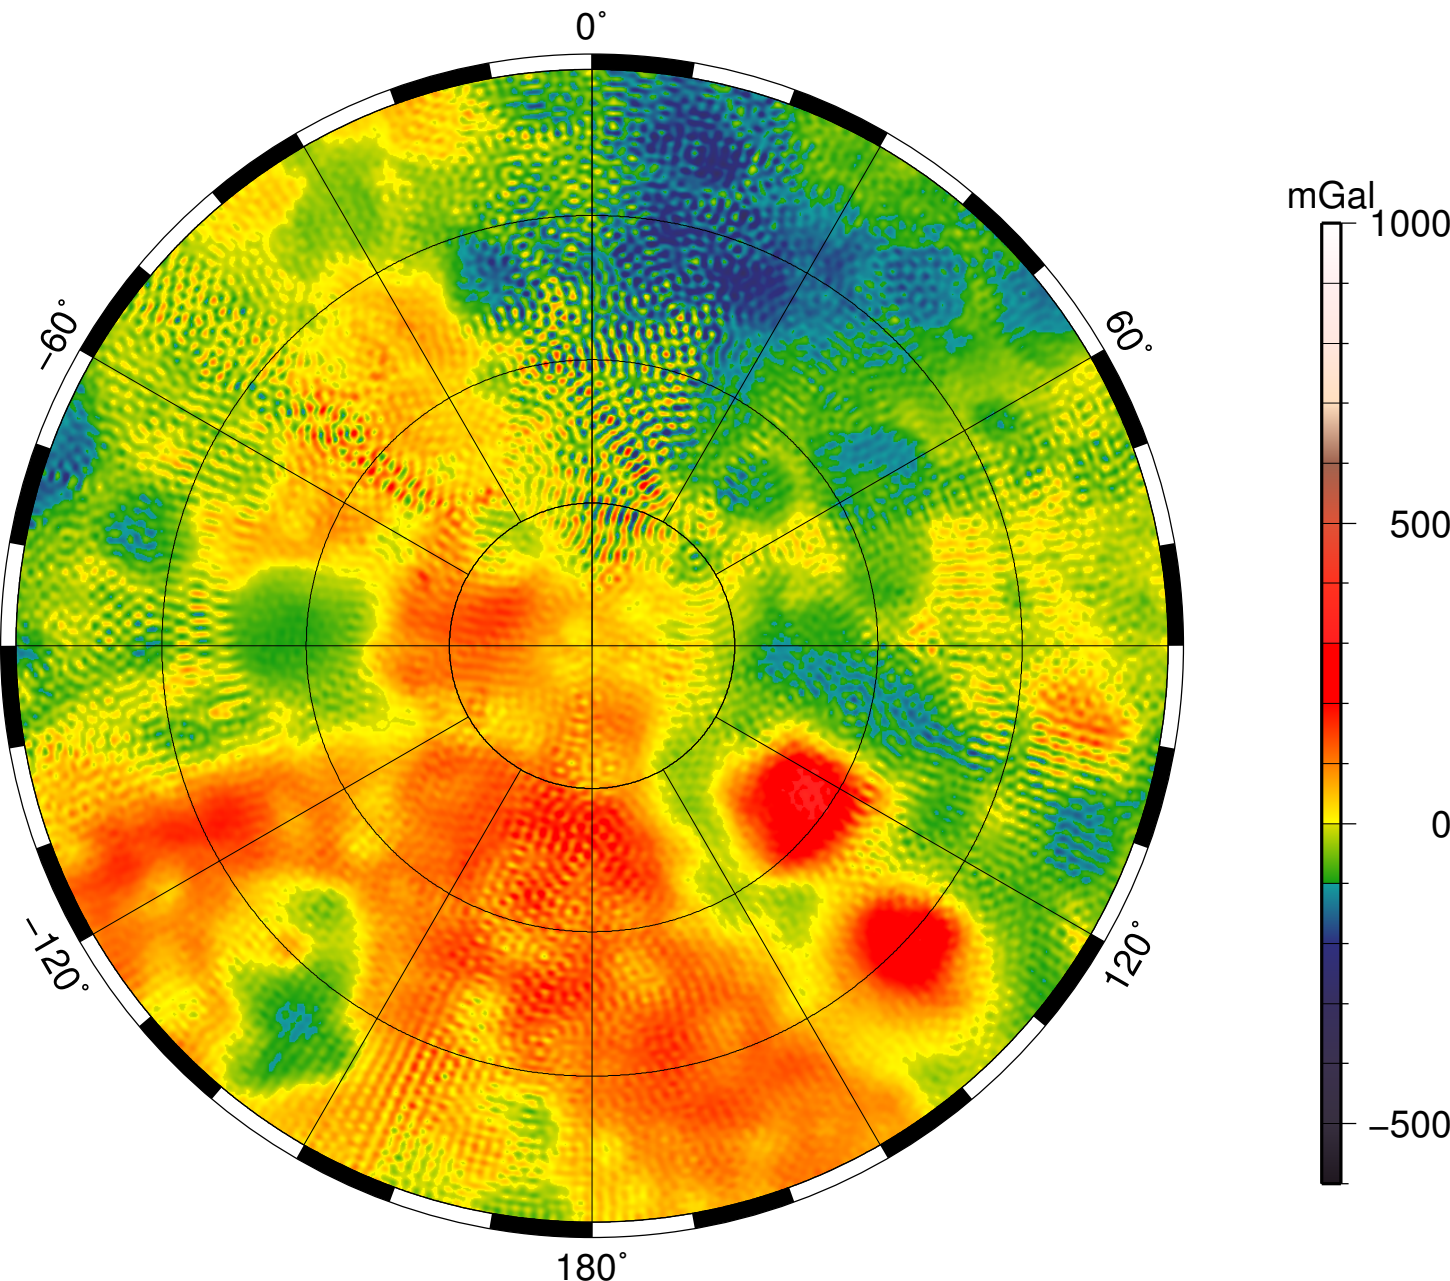

Supplement: grl0041-3367-sd5.pdf [file grl0041-3367-sd5.pdf]

# Local Bouguer

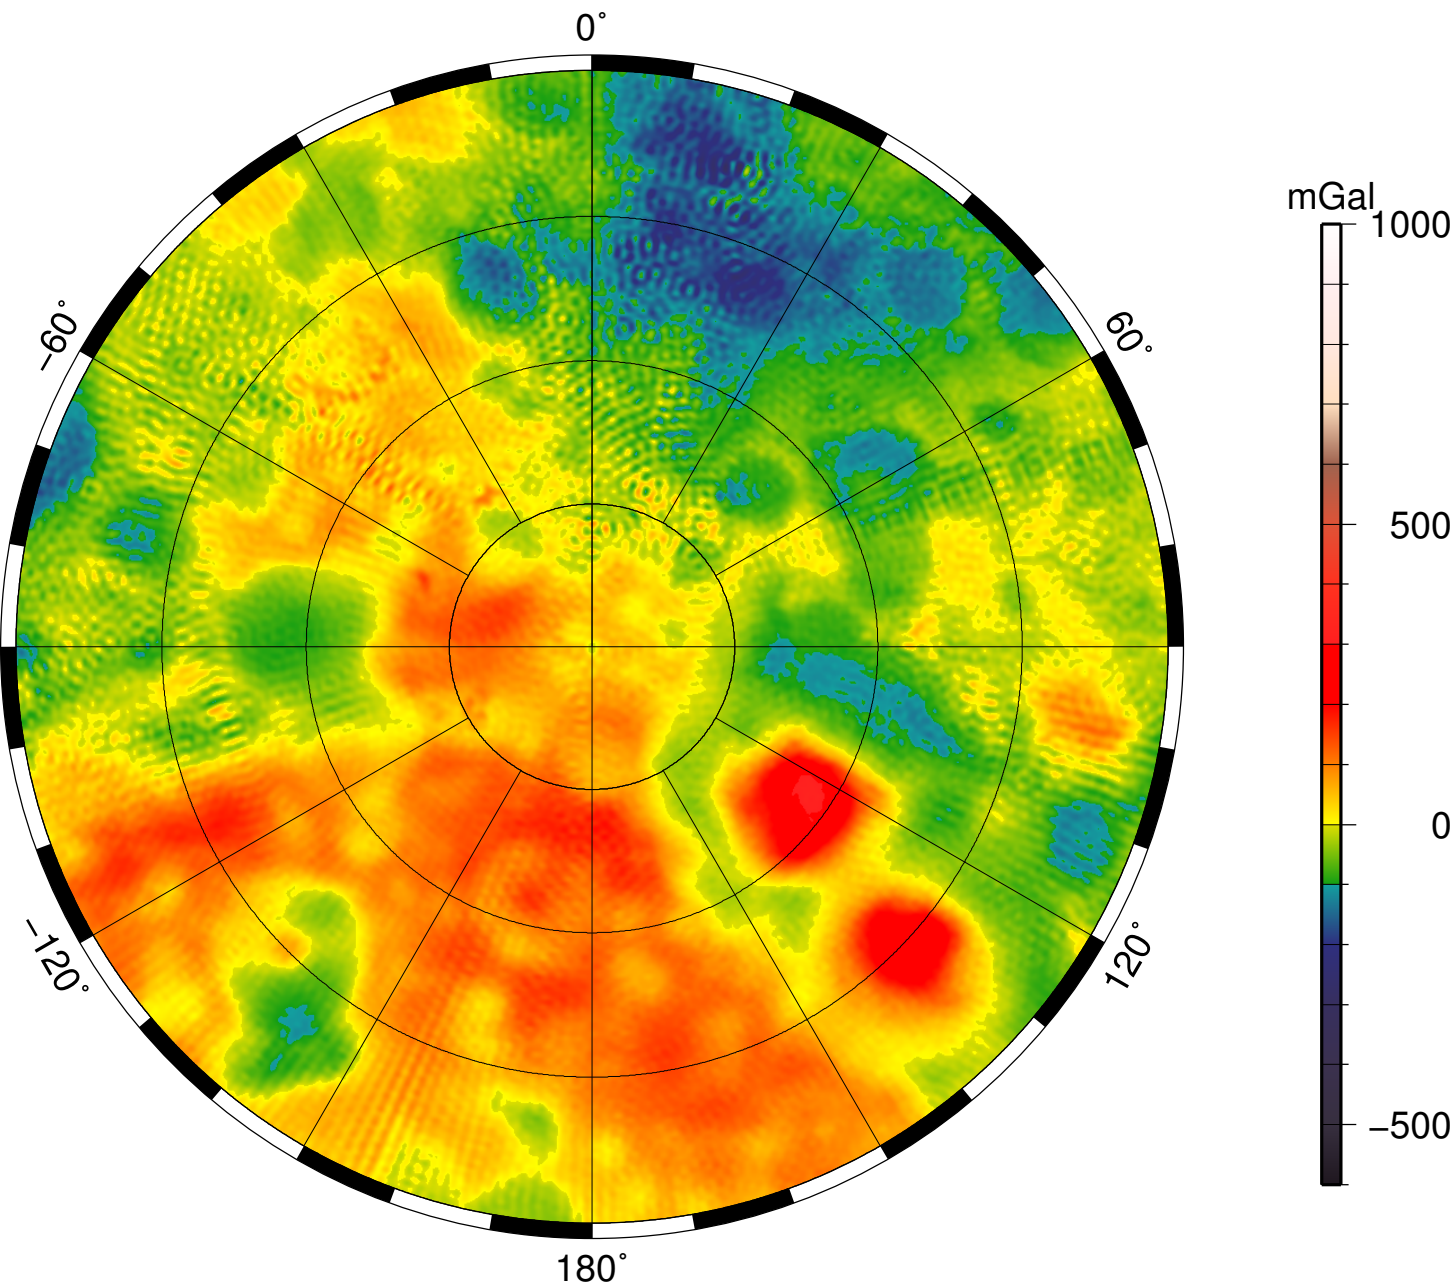

Supplement: grl0041-3367-sd6.pdf [file grl0041-3367-sd6.pdf]

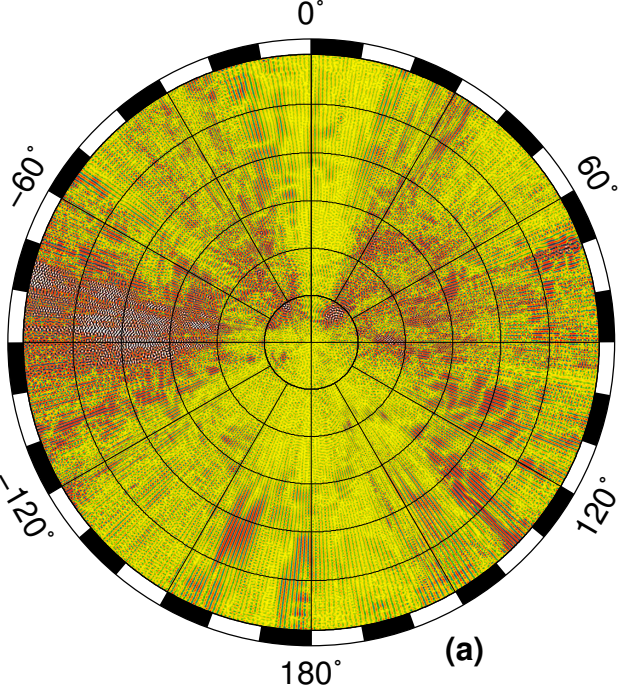

+

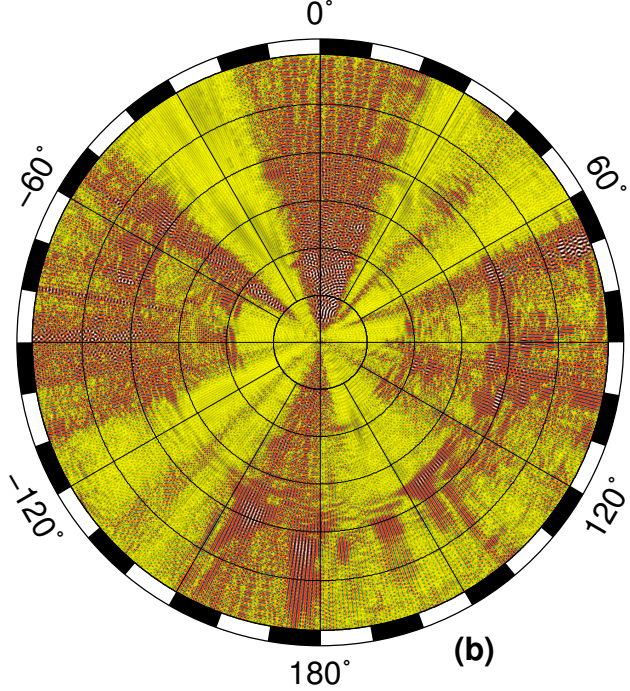

=

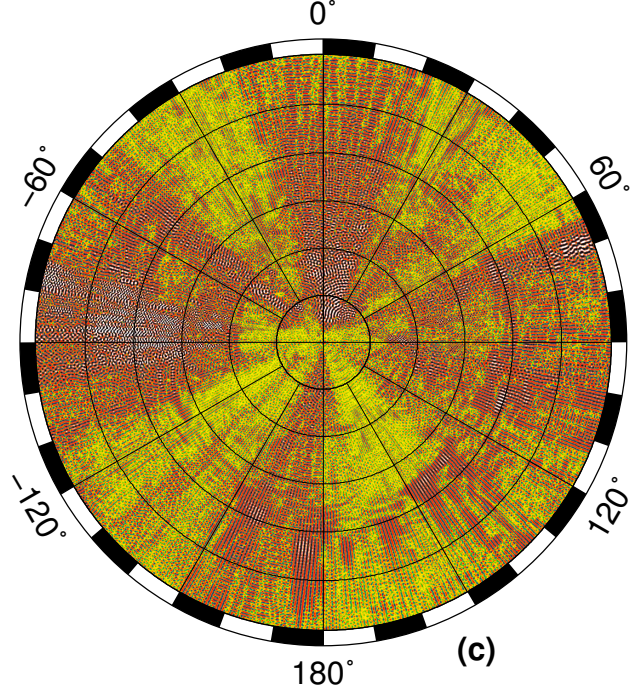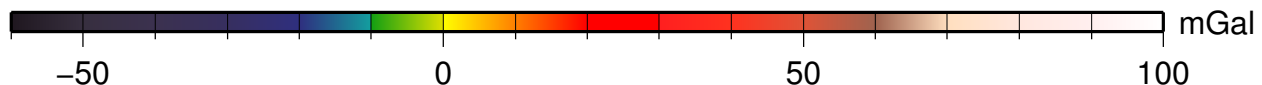

Supplement: grl0041-3367-sd7.pdf [file grl0041-3367-sd7.pdf]
